# Supplementary material for: Bismuth selenide nanosheets confined in thin carbon layers as anode materials for advanced potassium-ion batteries
Source: Royal Society of Chemistry journal article supplement (doi:10.1039/d1qi00672j), 2021-01-01
Supplement: d1qi00672j1.pdf [file d1qi00672j1.pdf]

## Supplementary Information

### **Bismuth selenide nanosheets confined in thin carbon layers as anode material for advanced potassium-ion batteries**

*Xingxing Zhao<sup>a,1</sup>, Chenglin Zhang<sup>b,1</sup>, Guowei Yang<sup>a</sup>, Yuhan Wu<sup>b</sup>, Qun Fu<sup>a</sup>, Huaping Zhao<sup>b</sup>, and Yong Lei<sup>b,\*</sup>*

<sup>a</sup>Institute of Nanochemistry and Nanobiology, School of Environmental and Chemical Engineering, Shanghai University, Shanghai 200444, China.

<sup>b</sup>Fachgebiet Angewandte Nanophysik, Institut für Physik & IMN MacroNano, Technische Universität Ilmenau, 98693 Ilmenau, Germany.

\*E-mail: yong.lei@tu-ilmenau.de.

<sup>1</sup>Xingxing Zhao and Chenglin Zhang contributed equally to this work.

Keywords: Bi<sub>2</sub>Se<sub>3</sub>, Anode, Potassium-ion battery, Electrochemical performance

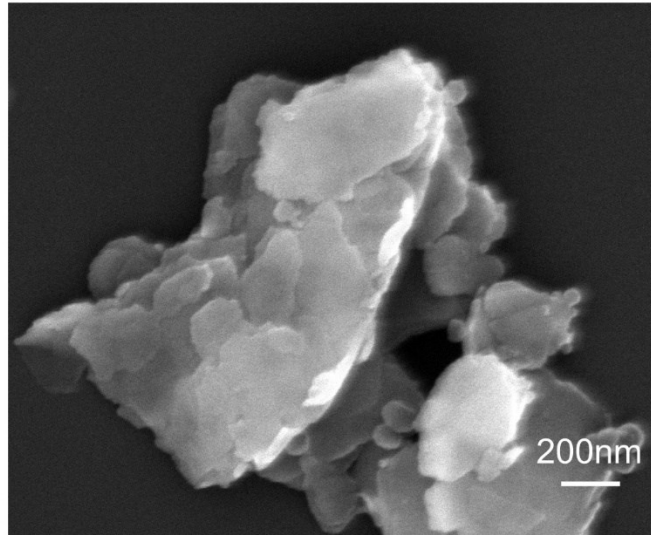

**Figure S1** SEM images of Bi<sub>2</sub>Se<sub>3</sub>.

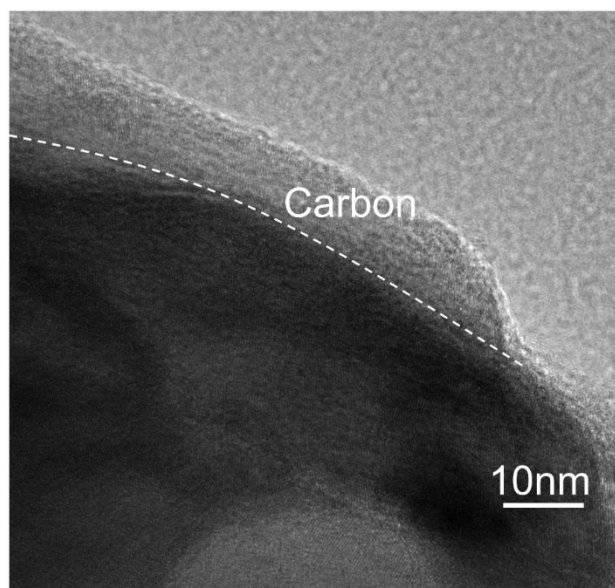

**Figure S2** TEM images of  $\text{Bi}_2\text{Se}_3@\text{C}$ .

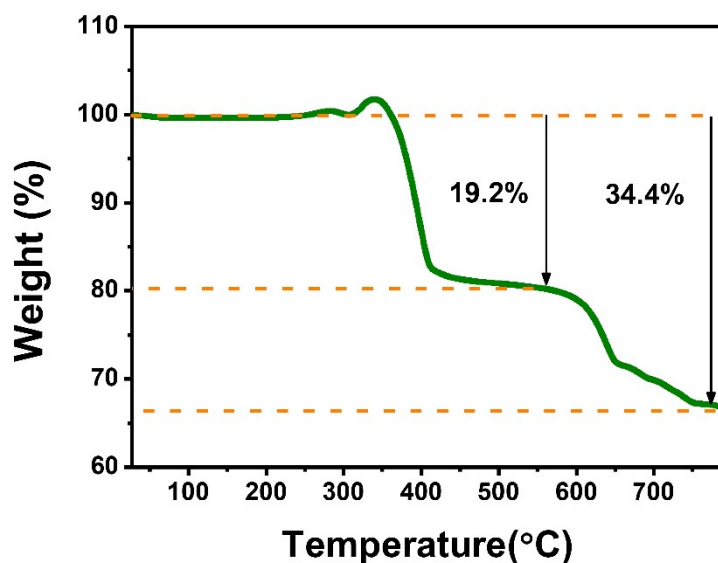

**Figure S3** Thermogravimetric analysis of  $\text{Bi}_2\text{Se}_3@\text{C}$ .

In the TGA curve, the weight loss of  $\text{Bi}_2\text{Se}_3@\text{C}$  is 34.4%. The  $\text{Bi}_2\text{Se}_3@\text{C}$  first experiences a weight increase because of the oxidation reaction of  $\text{Bi}_2\text{Se}_3$  to  $\text{Bi}_2\text{O}_3$  and  $\text{SeO}_2$ . Second, the carbon is oxidated to  $\text{CO}_2$  and the  $\text{SeO}_2$  product is volatilized at high temperature. The final product is only  $\text{Bi}_2\text{O}_3$ . The weight loss from pure  $\text{Bi}_2\text{Se}_3$  to  $\text{Bi}_2\text{O}_3$  is 28.9% according to the equation (1):

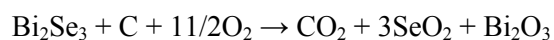

Therefore, the weight loss can be illustrated as the equation (2):

$$28.9\% (1-W) + W = 34.4\%$$

Where  $W$  represents the loading content of carbon,  $(1-W)$  represents the loading content of  $\text{Bi}_2\text{Se}_3$ . Thus, the content of carbon in the samples can be calculated as  $\sim 8\%$ .<sup>[1,2]</sup>

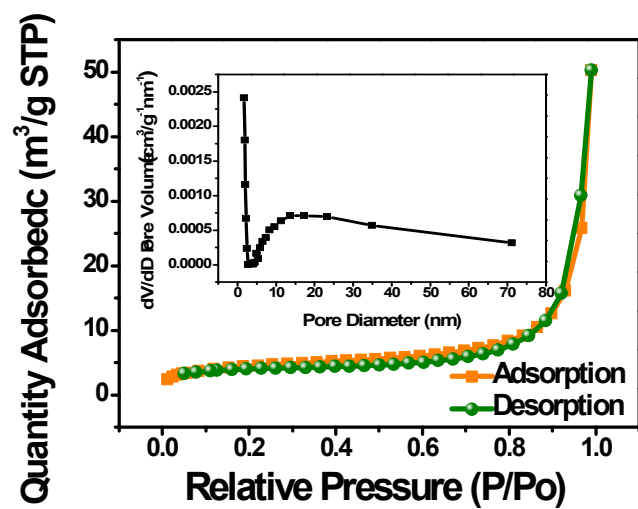

**Figure S4** Nitrogen adsorption isotherm and pore size distribution (insert) of Bi<sub>2</sub>Se<sub>3</sub>@C.

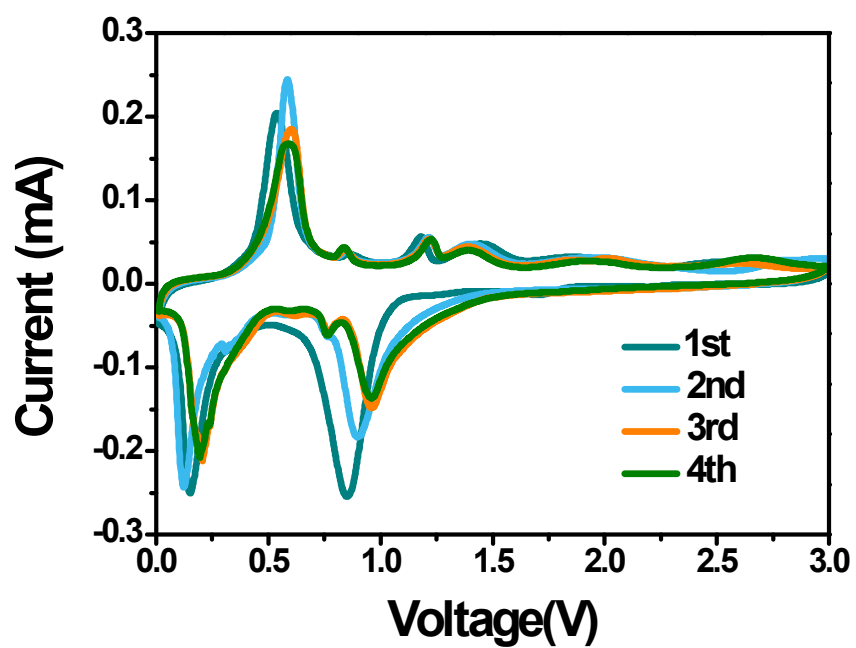

**Figure S5** Initial four CV curves of Bi<sub>2</sub>Se<sub>3</sub> electrode at a scan rate of 0.1 mV s<sup>-1</sup> in a potential range from 0.01 to 3V.

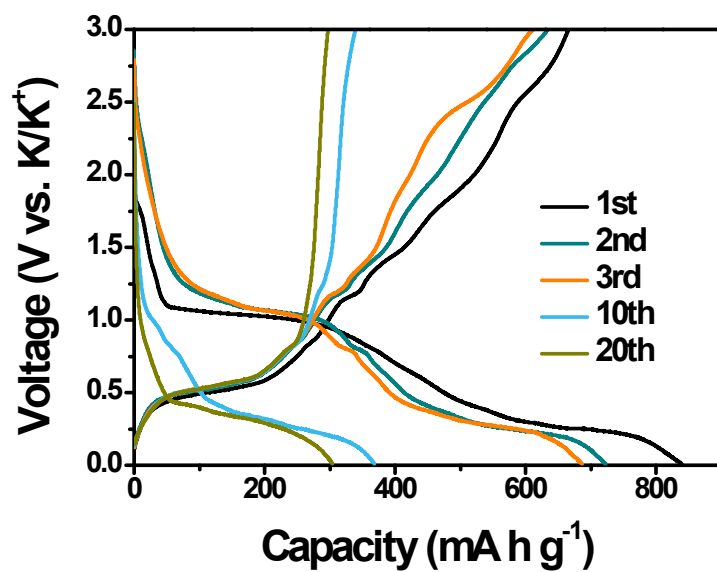

**Figure S6** Discharge and charge profiles of Bi<sub>2</sub>Se<sub>3</sub> within the potential of 0.01–3V at a current density of 100 mA g<sup>-1</sup>.

**Table S1** Comparison of some representative anodes in potassium-ion batteries.

| Samples                                  | Initial coulombic efficiency | Cyclic stability at a low current density                               | Rate capability                                                                         |                                                                | Cyclic stability at a high current density.                            | Ref.             |
|------------------------------------------|------------------------------|-------------------------------------------------------------------------|-----------------------------------------------------------------------------------------|----------------------------------------------------------------|------------------------------------------------------------------------|------------------|
|                                          |                              |                                                                         | Capacity                                                                                | Current densities                                              |                                                                        |                  |
| <b>Bi<sub>2</sub>Se<sub>3</sub>@C</b>    | <b>74%</b>                   | <b>397 mAh g<sup>-1</sup> at 0.1 A g<sup>-1</sup> after 100 cycles.</b> | <b>568, 446, 374, 311, 268, 210 and 526 mAh g<sup>-1</sup></b>                          | <b>0.05, 0.1, 0.2, 0.5, 1.0, 2.0 and 0.05 A g<sup>-1</sup></b> | <b>214 mAh g<sup>-1</sup> at 1 A g<sup>-1</sup> after 1000 cycles.</b> | <b>This work</b> |
| Co <sub>3</sub> O <sub>4</sub> @N-C      | 48.2%                        | 448.7 mAh g <sup>-1</sup> at 0.05 A g <sup>-1</sup> after 40 cycles.    | after the stage 0.1-2 C rate test, returns to 408.2 mAh g <sup>-1</sup>                 | 0.1, 0.2, 0.5, 1.0, 2.0 and 0.1 C                              | 213 mAh g <sup>-1</sup> at 0.5 A g <sup>-1</sup> after 740 cycles.     | 3                |
| 1D/2D C <sub>3</sub> N <sub>4</sub> /rGO | Null                         | Null                                                                    | after the stage 0.1-2 A g <sup>-1</sup> rate test, returns to 534.1 mAh g <sup>-1</sup> | 0.1, 0.2, 0.5, 1.0, 2.0 and 0.1 A g <sup>-1</sup>              | 228.6 mAh g <sup>-1</sup> at 10 A g <sup>-1</sup> after 1000 cycles.   | 4                |
| MoSe <sub>2</sub> @NCT                   | Null                         | 247 mAh g <sup>-1</sup> at 0.1 A g <sup>-1</sup> after 100 cycles.      | after the stage 0.1-2 A g <sup>-1</sup> rate test, returns to 240 mAh g <sup>-1</sup>   | 0.1, 0.2, 0.5, 1.0, 2.0 and 0.1 A g <sup>-1</sup>              | 74 mAh g <sup>-1</sup> at 1 A g <sup>-1</sup> after 600 cycles.        | 5                |
| NPCP@MoSe <sub>2</sub>                   | Null                         | 325 mAh g <sup>-1</sup> at 0.1 A g <sup>-1</sup> after 80 cycles.       | 322, 296, 283, 221, 172, 134 and 310 mAh g <sup>-1</sup>                                | 0.1, 0.2, 0.5, 1.0, 2.0, 5.0 and 0.1 A g <sup>-1</sup>         | 128 mAh g <sup>-1</sup> at 0.5 A g <sup>-1</sup> after 1000 cycles.    | 6                |
| Sn-MoS <sub>2</sub> /C                   | 88%                          | 239 mAh g <sup>-1</sup> at 0.1 A g <sup>-1</sup> after 50 cycles.       | 375, 233, 214, 162, 123 and 310 mAh g <sup>-1</sup>                                     | 0.05, 0.1, 0.2, 0.5, 0.8 and 0.05 A g <sup>-1</sup>            | Null                                                                   | 7                |
| SnSSe/MGS                                | 73.5%                        | 271 mAh g <sup>-1</sup> at 0.1 A g <sup>-1</sup> after 500 cycles.      | 460, 435, 399, 330, 270, 219 and 405 mAh g <sup>-1</sup>                                | 0.1, 0.2, 0.5, 1, 2, 5 and 0.1 A g <sup>-1</sup>               | Null                                                                   | 8                |
| V <sub>5</sub> Se <sub>8</sub> @C        | 58.6%                        | 378 mAh g <sup>-1</sup> at 0.2 A g <sup>-1</sup> after 300 cycles.      | 328, 316, 293, 257, 201, 162 and 319 mAh g <sup>-1</sup>                                | 0.1, 0.2, 0.5, 1, 2, 4 and 0.1 A g <sup>-1</sup>               | 145 mAh g <sup>-1</sup> at 4 A g <sup>-1</sup> after 800 cycles.       | 9                |
| MoS <sub>2</sub> @C                      | Null                         | 241 mAh g <sup>-1</sup> at 0.1 A g <sup>-1</sup> after 20 cycles.       | 876, 306, 203, 135, 98 mAh g <sup>-1</sup>                                              | 0.05, 0.1, 0.2, 0.5, 0.8 A g <sup>-1</sup>                     | 214 mAh g <sup>-1</sup> at 1 A g <sup>-1</sup> after 400 cycles.       | 10               |
| MoSe <sub>2</sub> @CNTs                  | 69.3%                        | 320.9 mAh g <sup>-1</sup> at 0.1 A g <sup>-1</sup> after 100 cycles.    | 354.8, 339.4, 293.0, 264.4, 245.3, 209.7, 186.1 and 401.2 mAh g <sup>-1</sup>           | 0.1, 0.2, 0.5, 1.0, 2.0, 5.0, 10.0 and 0.1 A g <sup>-1</sup>   | 159 mAh g <sup>-1</sup> at 2 A g <sup>-1</sup> after 200 cycles.       | 11               |
| MoSe <sub>2</sub> /N-C                   | 79.9%                        | 258.2 mAh g <sup>-1</sup> at 0.1 A g <sup>-1</sup> after 300 cycles.    | 300, 244, 211, 195, 178 and 300 mAh g <sup>-1</sup>                                     | 0.1, 0.2, 0.5, 1.0, 2.0, 5.0 and 0.1 A g <sup>-1</sup>         | Null                                                                   | 12               |
| CuS@GO                                   | 43.2%                        | 290.5 mAh g <sup>-1</sup> at 0.1 A g <sup>-1</sup> after 100 cycles.    | 407.7, 322.75, 291.4, 256.2, 196.5 and 400 mAh g <sup>-1</sup>                          | 0.1, 0.2, 0.3, 0.5, 1.0 and 0.1 A g <sup>-1</sup>              | Null                                                                   | 13               |
| MoS <sub>2</sub> /C@NDG                  | 59.3%                        | Null                                                                    | 343.2, 229.6, 176.6 and 300.8 mAh g <sup>-1</sup>                                       | 0.5, 1.0, 2.0 and 0.3 A g <sup>-1</sup>                        | 220.7 mAh g <sup>-1</sup> at 1 A g <sup>-1</sup> after 150 cycles.     | 14               |



|                                      |      |                                                                     |                                                                      |                                                          |                                                                      |    |
|--------------------------------------|------|---------------------------------------------------------------------|----------------------------------------------------------------------|----------------------------------------------------------|----------------------------------------------------------------------|----|
| FeMoSe <sub>4</sub> @NC              | 65%  | 298 mAh g <sup>-1</sup> at 0.2 A g <sup>-1</sup> after 100 cycles.  | 313, 309, 282, 227 and 298 mAh g <sup>-1</sup>                       | 0.1, 0.2, 0.5, 1.0 and 0.1 A g <sup>-1</sup>             | 178 mAh g <sup>-1</sup> at 1 A g <sup>-1</sup> after 150 cycles.     | 15 |
| Sb <sub>2</sub> Se <sub>3</sub> @RGO | 49%  | 286.6 mAh g <sup>-1</sup> at 0.1 A g <sup>-1</sup> after 80 cycles. | 557.5, 376.4, 325.4, 248.0, 173.3, 118.6 and 558 mAh g <sup>-1</sup> | 0.05, 0.1, 0.2, 0.5, 1.0, 2.0 and 0.05 A g <sup>-1</sup> | 203.4 mAh g <sup>-1</sup> at 0.5 A g <sup>-1</sup> after 460 cycles. | 16 |
| FeSe <sub>2</sub>                    | 50%  | 330 mAh g <sup>-1</sup> at 0.1 A g <sup>-1</sup> after 100 cycles.  | 326, 278, 234, 206, 178, 135 and 356 mAh g <sup>-1</sup>             | 0.1, 0.2, 0.5, 1.0, 2.0, 5.0 and 0.1 A g <sup>-1</sup>   | 128 mAh g <sup>-1</sup> at 2 A g <sup>-1</sup> after 500 cycles.     | 17 |
| CoSe@NrGO                            | Null | 218 mAh g <sup>-1</sup> at 0.2 A g <sup>-1</sup> after 100 cycles.  | 364, 357, 342, 302, and 166 mAh g <sup>-1</sup>                      | 0.2, 0.5, 1.0, 2.0 and 5.0 A g <sup>-1</sup>             | 143 mAh g <sup>-1</sup> at 2 A g <sup>-1</sup> after 100 cycles.     | 18 |

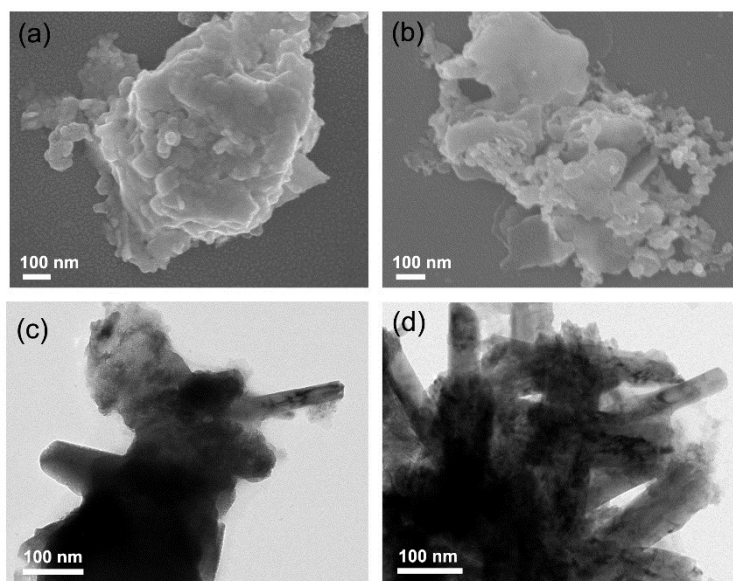

**Figure S7** SEM images of (a) Bi<sub>2</sub>Se<sub>3</sub> and (b) Bi<sub>2</sub>Se<sub>3</sub>@C after 20 cycles. The corresponding TEM images of (c) Bi<sub>2</sub>Se<sub>3</sub> and (d) Bi<sub>2</sub>Se<sub>3</sub>@C.

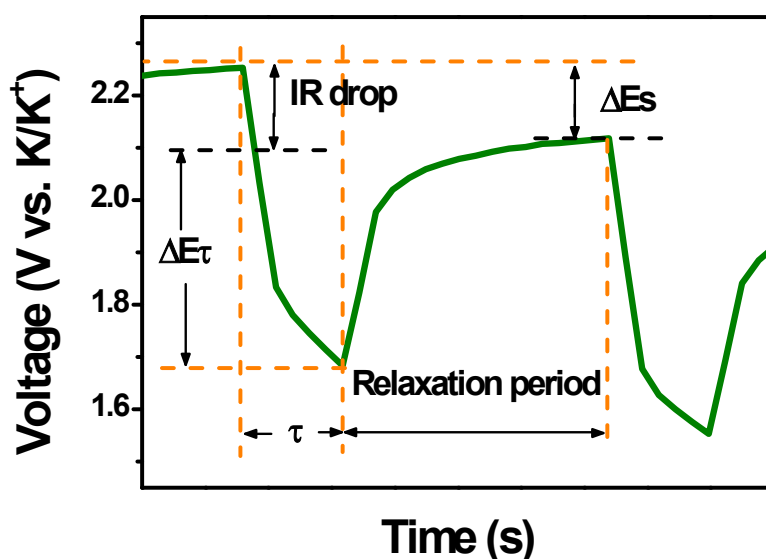

**Figure S8** Schematic illustration of selected steps from the GITT profile during charging

The transfer of  $K^+$  obeys the Fick's second law, the diffusion coefficient can be calculated by the following equation:

$$D_K = \frac{4}{\pi\tau} \frac{m_B V_M}{A M_B} \frac{\Delta E_s}{(\Delta E_t)^2} (\tau \ll \frac{L^2}{D})$$

where  $\tau$  is the duration time of the current pulse,  $V_M$  is the molar volume ( $\text{cm}^3 \text{mol}^{-1}$ ),  $m_B$  is the mass of the active material,  $M_B$  is the molecular weight ( $\text{g mol}^{-1}$ ),  $A$  is the total contact area of electrode with electrolyte,  $\Delta E_t$  is the variation of the cell voltage, and  $\Delta E_s$  is related to the change of steady-state voltage for the corresponding step.

### References

1. D. Li, J. Zhou, X. Chen and H. Song, *ACS Appl. Mater. Interfaces*, 2018, 10, 30379–30387.
2. L. X. Xie, Z. Yang, J. Y. Sun, H. Q. Zhou, X. W. Chi, H. L. Chen, A. X. Li, Y. Yao and S. Chen, *Nanomicro Lett*, 2018, 10, 50.
3. D. Adekoya, H. Chen, H. Y. Hoh, T. Gould, M. S. J. T. Balogun, C. Lai, H. Zhao and S. Zhang, *ACS Nano*, 2020, 14, 5027–5035.

4. D. Adekoya, M. Li, M. Hankel, C. Lai, M.-S. Balogun, Y. Tong and S. Zhang, *Energy Storage Mater.*, 2020, **25**, 495–501.
5. N. N. Li, L. Sun, K. Wang, J. Zhang and X. H. Liu, *Electrochim. Acta*, 2020, **360**, 136983.
6. 4. Q. Jiang, L. Wang, Y. Wang, M. Qin, R. Wu, Z. Huang, H. J. Yang, Y. Li, T. Zhou and J. Hu, *J. Colloid Interface Sci.*, 2021, **600**, 430–439.
7. D. G. Yin, Z. Chen and M. Zhang, *J. Phys. Chem. Solids*, 2019, **126**, 72–77.
8. Z. Y. Yi, J. Y. Xu, Z. H. Xu, M. Zhang, Y. N. He, J. C. Bao and X. S. Zhou, *J. Energy Chem.*, 2021, **60**, 241–248.
9. C. Yang, F. Lv, K. Dong, F. L. Lai, K. N. Zhao, F. Sun, S. M. Dou, Q. Wang, J. Xu, P. P. Zhang, T. Arlt, X. D. Chen, Y. N. Chen, I. Manke and S. J. Guo, *Energy Storage Mater.*, 2021, **35**, 1–11.
10. Z. Chen, S. L. Chen, H. F. Zhang, M. Q. Liu, Z. J. Feng, X. B. Li, J. T. Huang and D. Guo, *Ionics*, 2020, **26**, 1779–1786.
11. Y. H. Wu, Q. C. Zhang, Y. Xu, R. Xu, L. Li, Y. L. Li, C. L. Zhang, H. P. Zhao, S. Wang, U. Kaiser and Y. Lei, *ACS Appl. Mater. Interfaces*, 2021, **13**, 18838–18848.
12. J. Ge, L. Fan, J. Wang, Q. Zhang, Z. Liu, E. Zhang, Q. Liu, X. Yu and B. Lu, *Adv. Energy Mater.*, 2018, **8**, 1801477.
13. X. X. Jia, E. J. Zhang, X. Z. Yu and B. A. Lu, *Energy Technology*, 2020, **8**, 1900987.
14. J. Zhang, P. Cui, Y. Gu, D. Wu, S. Tao, B. Qian, W. Chu and L. Song, *Adv. Mater. Interfaces*, 2019, **6**, 1901066.
15. J. Chu, Q. Yu, D. Yang, L. Xing, C. Y. Lao, M. Wang, K. Han, Z. Liu, L. Zhang, W. Du, K. Xi, Y. Bao and W. Wang, *Appl. Mater. Today*, 2018, **13**, 344–351.
16. Z. Yi, Y. Qian, J. Tian, K. Shen, N. Lin and Y. Qian, *J. Mater. Chem. A*, 2019, **7**, 12283–12291.
17. W. Zhao, Q. Tan, K. Han, D. He, P. Li, M. Qin and X. Qu, *J. Phys. Chem. C*, 2020, **124**, 12185–12194.
18. Y. Liu, K. Cui, Z. Ma and X. Wang, *Energy & Fuels*, 2020, **34**, 10196–10202.
